# Supplementary material for: A submersible probe with in-line calibration and a symmetrical reference element for continuous direct nitrate concentration measurements
Source: Royal Society of Chemistry journal article supplement (doi:10.1039/d2em00341d), 2022-12-22
Supplement: d2em00341d1.pdf [file d2em00341d1.pdf]

Supporting Information for:  
**Submersible Probe with In-line Calibration and Symmetrical Reference Element for  
Continuous Direct Nitrate Concentration Measurements**

Tara Forrest <sup>a</sup>, Thomas Cherubini <sup>a</sup>, Stéphane Jeanneret <sup>a</sup>, Elena Zdrachek <sup>a</sup>, Polyxeni Damala <sup>a</sup>, Eric Bakker <sup>a</sup>

<sup>a</sup> Department of Inorganic and Analytical Chemistry, University of Geneva, Quai Ernest-Ansermet 30, CH-1211 Geneva, Switzerland

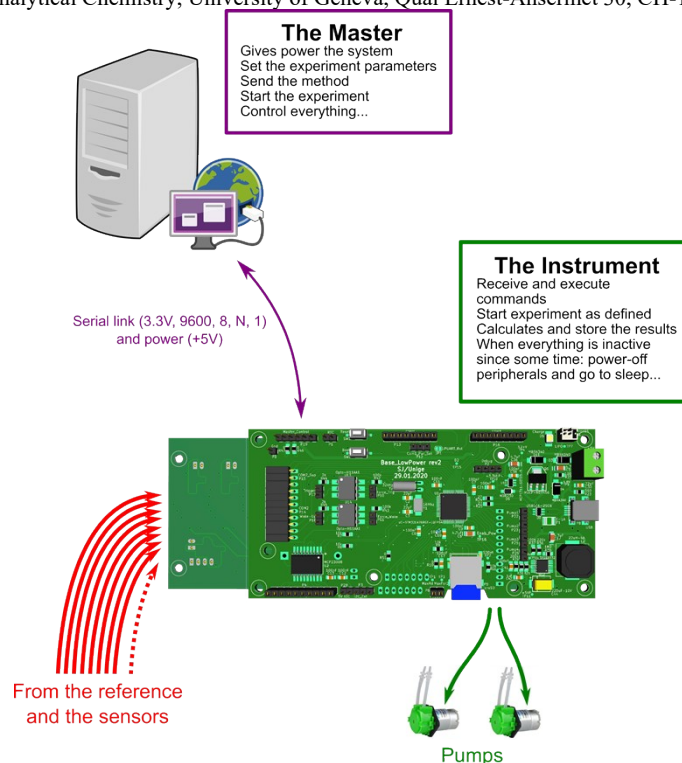

Figure S1 : Scheme of main board controlling the probe. The Master (user) controls the probe and sets up the experiment that is run by the instrument. Through commands the instrument activates pump and executes different operations

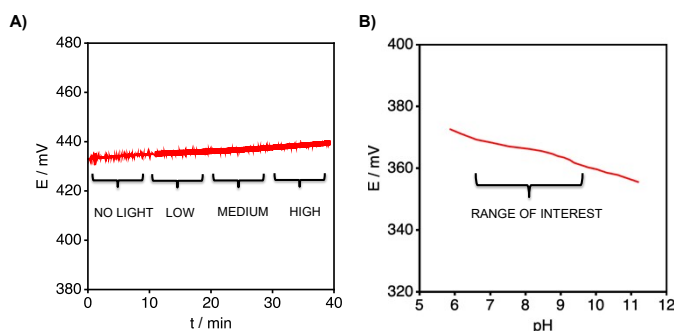

Figure S2 : A) Response of nitrate-selective electrode in 1 mM  $\text{NaNO}_3$  subjected to different light intensities. The signal was first measured in full darkness (no light) and then LED lights were turned on at different intensities: 563 LM (low) – 1126 LM (medium) – 1690 LM (high). B) Response of nitrate-selective electrode in 1 mM  $\text{NaNO}_3$  while varying the pH. 1 M  $\text{H}_2\text{SO}_4$  was first spiked into the solution to reach an acidic pH and then 0.1 M  $\text{NaOH}$  was gradually added to reach a basic pH.

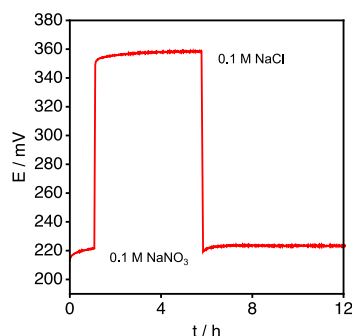

Figure S3 : Response of nitrate-selective electrode in 0.1 M  $\text{NaNO}_3$  for 1h followed by immersion in 0.1 M  $\text{NaCl}$  for 6h. The electrodes were then again immersed in 0.1 M  $\text{NaNO}_3$  to check the signal recovery. No water layer formation could be observed during the testing period.

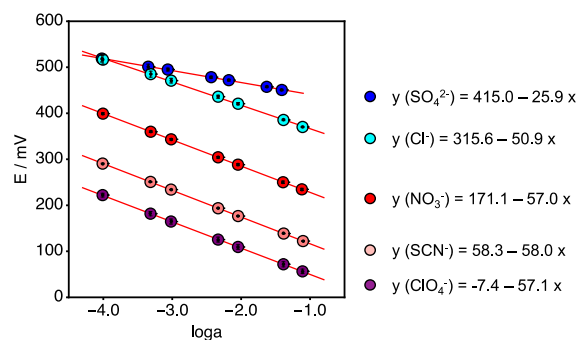

Figure S4 : Potentiometric response of electrode for several anions. The selectivity experiment was performed according to the MSSM, where calibrations were performed sequentially according to the lipophilicity of the anions. From top to bottom, potentiometric response towards:  $\text{Na}_2\text{SO}_4$  (blue),  $\text{NaCl}$  (cyan),  $\text{NaNO}_3$  (red),  $\text{NaSCN}$  (pink) and  $\text{NaClO}_4$  (purple).

Table S1 : Calculated selectivity coefficients from Figure S4.

| Primary Ion     | Interfering Ion    | $\log K_{ij}^{\text{Pot}}$ | $K_{ij}^{\text{Pot}}$ |
|-----------------|--------------------|----------------------------|-----------------------|
| $\text{NO}_3^-$ | $\text{SO}_4^{2-}$ | -8.38                      | $4.13 \cdot 10^{-9}$  |
|                 | $\text{Cl}^-$      | -2.48                      | $3.27 \cdot 10^{-3}$  |
|                 | $\text{SCN}^-$     | 1.94                       | $8.68 \cdot 10^1$     |
|                 | $\text{ClO}_4^-$   | 3.07                       | $1.17 \cdot 10^3$     |

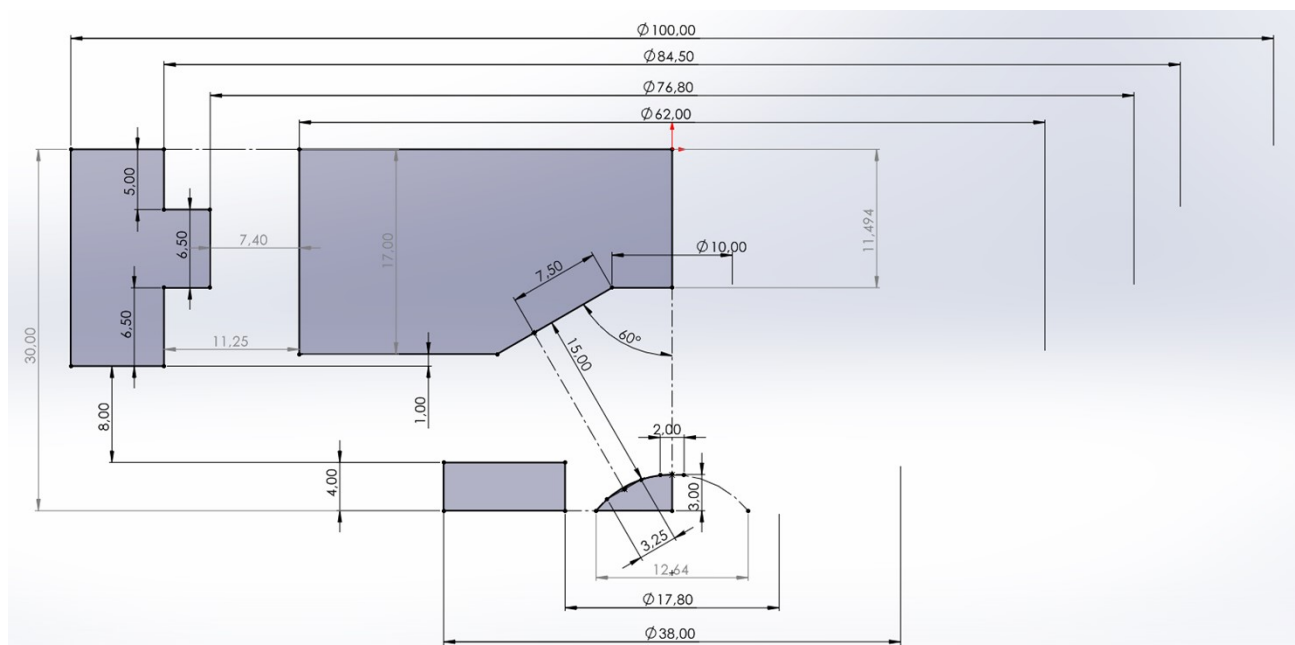

Figure S5 : Schematic side cut of sensing dome and its housing. The dimension are given in mm.

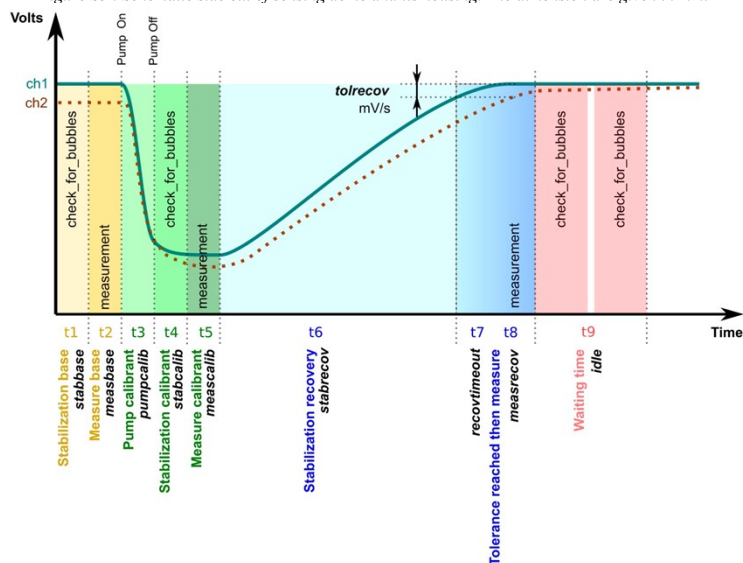

Figure S6 : Preprogrammable calibration routine. All timed events (t1 – t9) can be determined individually to customise the protocol to the adequate length and their description can be found in Table S5

Table S2 : Concentrations of all major ions in Rhône River sample with determination method

| Ion                           | Method                         | Concentration [M]     |
|-------------------------------|--------------------------------|-----------------------|
| Cl <sup>-</sup>               | Ion Chromatography             | 2.76·10 <sup>-4</sup> |
| NO <sub>3</sub> <sup>-</sup>  | Ion Chromatography             | 3.53·10 <sup>-5</sup> |
| SO <sub>4</sub> <sup>2-</sup> | Ion Chromatography             | 4.76·10 <sup>-4</sup> |
| HCO <sub>3</sub> <sup>-</sup> | Titration                      | 9.37·10 <sup>-4</sup> |
| Na <sup>+</sup>               | Atomic Emission Spectroscopy   | 2.86·10 <sup>-4</sup> |
| K <sup>+</sup>                | Atomic Emission Spectroscopy   | 6.18·10 <sup>-5</sup> |
| Ca <sup>2+</sup>              | Atomic Absorption Spectroscopy | 1.10·10 <sup>-3</sup> |
| Mg <sup>2+</sup>              | Atomic Absorption Spectroscopy | 2.34·10 <sup>-4</sup> |

Table S3 : Nitrate potentiometric response in Rhône River water sample. Potential values for raw sample and spiked sample (calibrant) recorded during tank-based experiment versus symmetrical nitrate reference.

| Cycle                          | 1      | 2      | 3      | 4      | 5      | 6      | 7      | Average | StDev |
|--------------------------------|--------|--------|--------|--------|--------|--------|--------|---------|-------|
| Sample potential value [mV]    | 2.92   | 2.75   | 2.42   | 2.67   | 2.79   | 2.74   | 2.63   | 2.70    | 0.16  |
| Calibrant potential value [mV] | -37.70 | -34.07 | -34.26 | -34.26 | -34.42 | -34.51 | -34.80 | -34.30  | 0.35  |
| Δ EMF [mV]                     | 36.62  | 36.82  | 36.93  | 36.93  | 37.21  | 37.25  | 37.43  | 37.01   | 0.29  |

Table S4 : Nitrate potentiometric response in Rhône River water sample. Potential values for raw sample and spiked sample (calibrant) recorded during tank-based experiment versus Ag/AgCl reference electrode.

| Cycle                          | 1     | 2     | 3     | 4     | 5     | 6     | 7     | Average | StDev |
|--------------------------------|-------|-------|-------|-------|-------|-------|-------|---------|-------|
| Sample potential value [mV]    | 34.16 | 33.20 | 34.70 | 34.52 | 34.41 | 34.74 | 33.63 | 34.19   | 0.58  |
| Calibrant potential value [mV] | -1.00 | -0.50 | 0.30  | 0.23  | -0.38 | -0.48 | -1.77 | -0.60   | 0.63  |
| Δ EMF [mV]                     | 35.16 | 33.70 | 35.00 | 34.29 | 34.79 | 35.22 | 35.40 | 34.79   | 0.60  |

Table S5 : Description of timed event during calibration routine presented in Figure S6

| Timed event | Name                    | Function                                                                                                                                                                                                            |
|-------------|-------------------------|---------------------------------------------------------------------------------------------------------------------------------------------------------------------------------------------------------------------|
| t1          | Stabilisation base      | Initial time at the beginning of the cycle set to leave time to the signal to stabilise                                                                                                                             |
| t2          | Measure base            | Measurement of the signal to have a potential value before the calibrant                                                                                                                                            |
| t3          | Pump calibrant          | Activation of calibrant pump. t3 will stop when t5 is over                                                                                                                                                          |
| t4          | Stabilisation calibrant | Time to have stabilisation of the calibrant signal                                                                                                                                                                  |
| t5          | Measure calibrant       | Measurement of the signal to have a potential value of the calibrant. This value will be stored internally during the cycle to calculate the analyte concentration of the sample. Pump is stopped at the end of t5. |
| t6          | Stabilisation recovery  | Gradual signal recovery. The sample slowly replaces the calibrant solution inside the sensing dome.                                                                                                                 |
| t7          | Recovery Timeout        | Correlates the current signal value with the one obtained in t2 to estimate if the calibrant solution has been fully replaced                                                                                       |
| t8          | Measure Recovery        |                                                                                                                                                                                                                     |
| t9          | Waiting time            | Records the measuring electrodes signal at fixed interval to have time based potential reading and concentration values.                                                                                            |

Table S6 : Concentrations of nitrate determined by ion chromatography (n=3)

| Time [min] | Concentration [M]            |
|------------|------------------------------|
| 50         | 4.093±0.023·10 <sup>-5</sup> |
| 1160       | 3.491±0.005·10 <sup>-5</sup> |
| 1400       | 3.583±0.004·10 <sup>-5</sup> |
| 1550       | 3.854±0.005·10 <sup>-5</sup> |
| 2690       | 3.846±0.004·10 <sup>-5</sup> |
| 4490       | 3.858±0.005·10 <sup>-5</sup> |

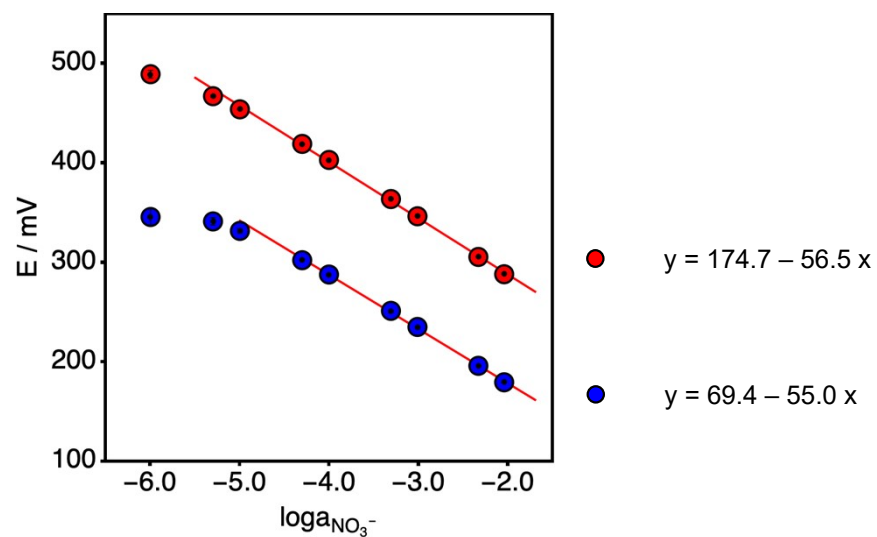

Figure S7 : Potentiometric response of same nitrate-selective electrode versus double-junction reference electrode before immersion in real sample (red trace) and after 75h immersion in real sample (blue trace). Error bars represent standard deviation ( $n=3$ ).
